# Supplementary material
Source: ML conference proceedings conference paper supplement (https://openreview.net/forum?id=ecqTSIMR2o)
Supplement: supplementary_material [file okvqa_example.pdf › Supplementary/okvqa_example.pdf]

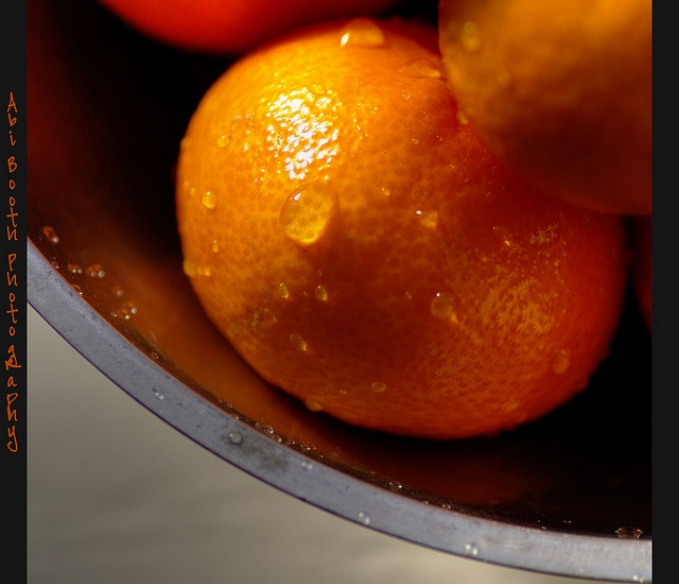

**Caption by VLV:** A close-up shot shows a bowl filled with three bright orange oranges, each glistening with water droplets. The bowl, which appears to be made of metal or a similar reflective material, has a dark, almost black interior. The oranges are positioned in the center of the bowl, with the one in the foreground taking up the majority of the frame. The other two oranges are partially visible in the background, slightly out of focus. The water droplets on the oranges create a sparkling effect, adding a sense of freshness and vibrancy to the image. The lighting is soft and diffused, casting gentle shadows and highlighting the textures of the oranges and the bowl. The overall mood is fresh and inviting, emphasizing the natural beauty of the fruit. The colors are vibrant and saturated, with the bright orange of the oranges contrasting against the dark background of the bowl. The composition is simple yet effective, drawing the viewer's attention to the oranges and their natural beauty. The focus is sharp on the oranges in the foreground, while the background is slightly blurred, creating a depth of field that draws the viewer's eye to the main subject. The image evokes a sense of simplicity and naturalness, highlighting the beauty of everyday objects. The overall impression is one of freshness, simplicity, and natural beauty.

**Caption by Gemini:** A close-up captures several bright orange oranges with tiny water droplets clinging to their textured surfaces, situated in a silver or gray metallic bowl. The bowl's rim is visible along the bottom left quadrant of the image, showing slight discoloration and wetness from the condensation or water. The oranges are arranged in a clustered fashion, with one in the center and others partially visible around it, suggesting a group. The light is distributed unevenly, with highlights on the wet parts of the oranges and the bowl, and shadows cast on areas where they touch. The overall color palette is dominated by oranges, with the silver or gray bowl providing a neutral contrast. The texture appears rough due to the visible pores on the orange peels and the water droplets adding a reflective quality. The mood is fresh and inviting, potentially evoking a sense of healthy eating or refreshing citrus. On the left side of the photo is text, oriented vertically, in a thin, sans-serif font, that reads "Abi Booth Photography."

Question: What states are these grown in?

Our Answer: Florida, California, Texas, Arizona

Gemini Answer: Florida, California

Ground-Truth:

["florida california", "florida california", "florida california", "florida california", "california", "california", "california", "california", "florida", "florida"]
