# Supplementary material
Source: ML conference proceedings conference paper supplement (https://openreview.net/forum?id=ecqTSIMR2o)
Supplement: supplementary_material [file supp1.pdf › Supplementary/supp1.pdf]

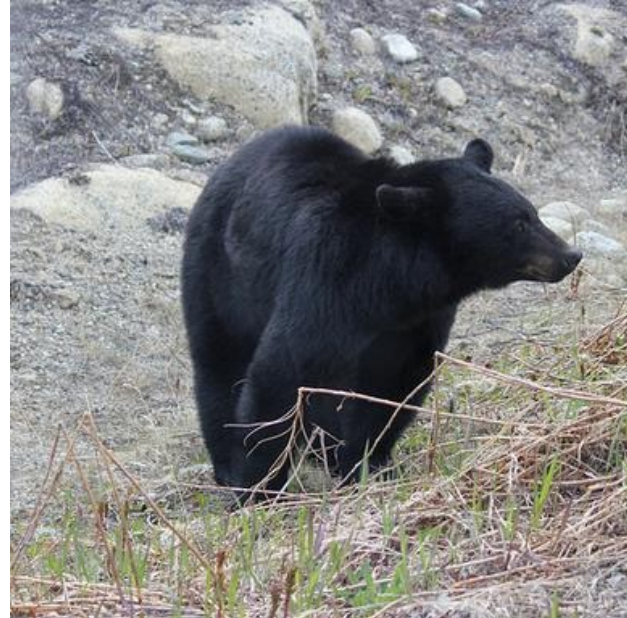

Raw Image

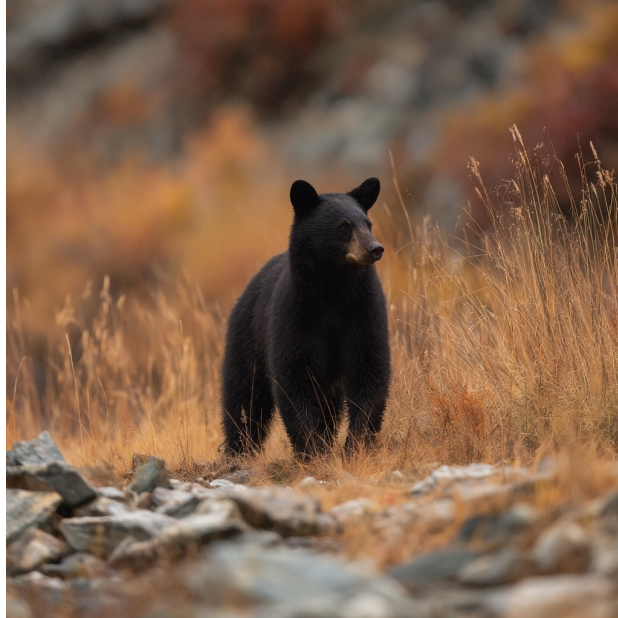

Midjourney

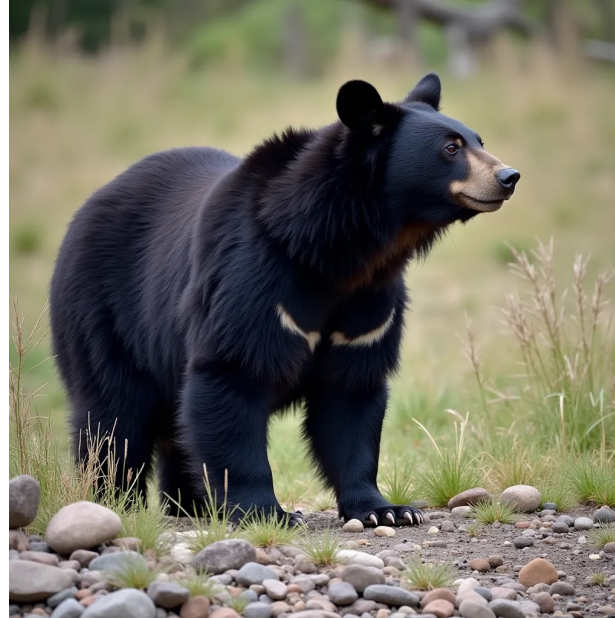

FLUX.1-dev

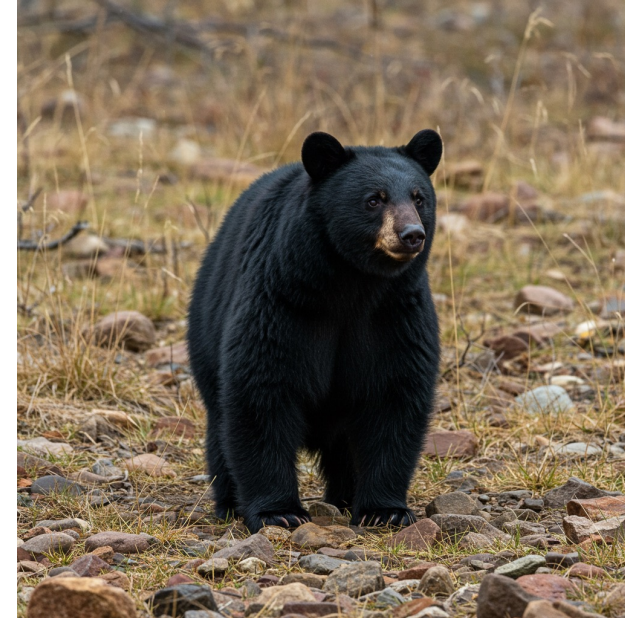

ImageFX

**Caption:** A medium shot captures a black bear standing in a grassy, rocky area. The bear is positioned in the center of the frame, facing slightly to the right, with its head turned towards the right side of the image. The bear's fur is a solid, glossy black, and its ears are small and rounded. It appears to be standing on its hind legs, with its front paws resting on the ground. The ground around the bear is covered with a mix of dry grasses and small, brown rocks. The rocks vary in size and color, ranging from light gray to dark brown. The grasses are a mix of green and brown, with some taller grasses reaching up towards the top of the frame. The lighting in the image appears to be soft and diffused, with no harsh shadows. The colors are muted and natural, with the black of the bear and the browns of the rocks and grasses dominating the scene. The overall mood of the image is peaceful and natural, capturing a moment of stillness in the bear's environment. The bear's posture and expression suggest a sense of calm and observation. The background is slightly blurred, drawing the viewer's attention to the bear in the foreground. The image is well-composed, with a clear focus on the bear and its surroundings. The texture of the bear's fur and the rough surface of the rocks are visible, adding depth and realism to the image.
