# Supplementary material
Source: ML conference proceedings conference paper supplement (https://openreview.net/forum?id=ecqTSIMR2o)
Supplement: supplementary_material [file supp2.pdf › Supplementary/supp2.pdf]

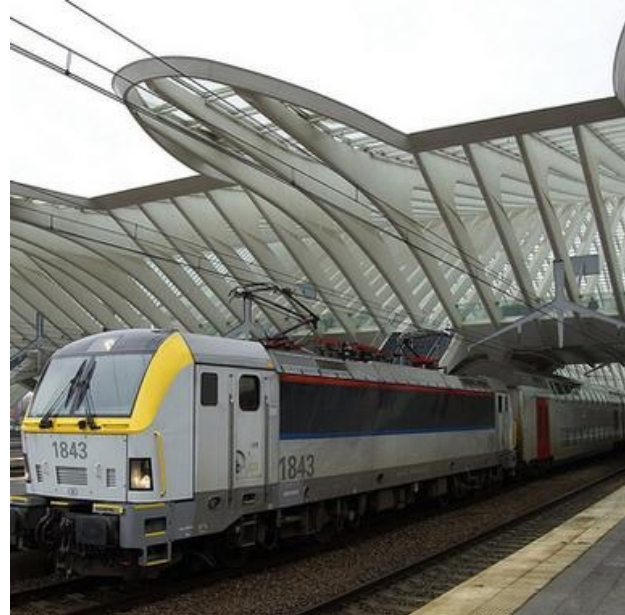

Raw Image

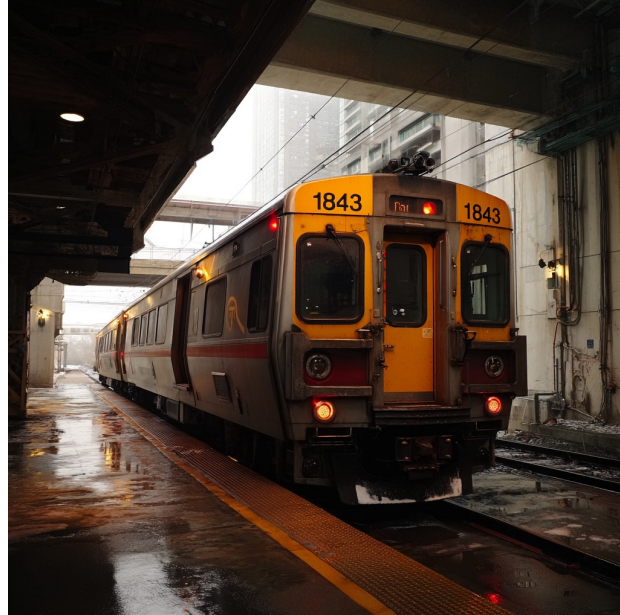

Midjourney

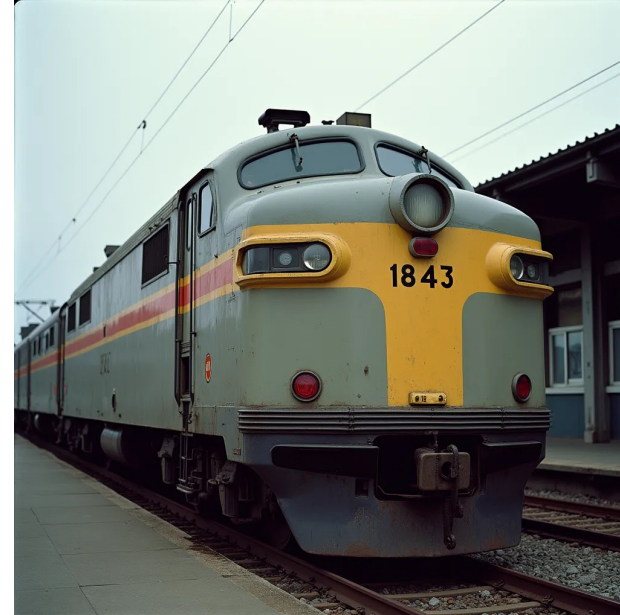

FLUX.1-dev

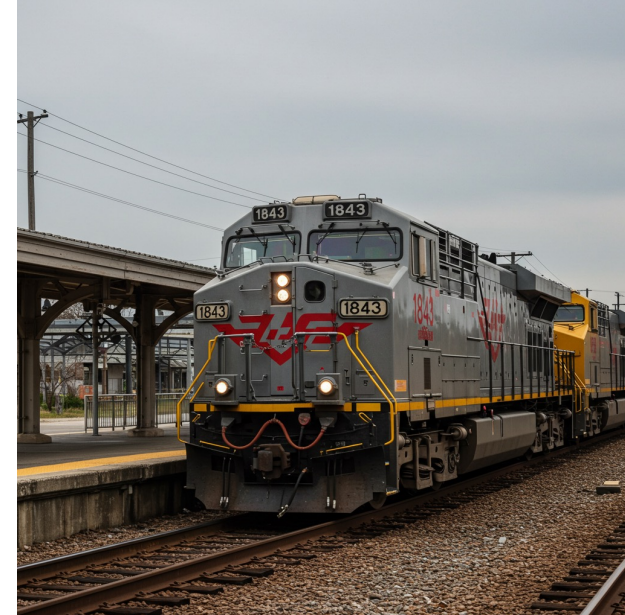

ImageFX

**Caption:** A medium, eye-level shot depicts a train car with the number \"1843\" painted on it, positioned on a train track in front of a train station. The train car is predominantly gray with yellow accents on the front and a red stripe running along the side. The number \"1843\" is prominently displayed on both the front and side of the car. The train track is visible beneath the train car, and the train station is visible in the background. The train station appears to be made of concrete and steel. The sky is overcast, and the lighting is soft and diffused. The overall mood of the image is calm and serene. The train car is the main subject of the image, and it is positioned in the foreground. The train station is visible in the background, and the sky is overcast. The lighting is soft and diffused, and the overall mood of the image is calm and serene.
