# Supplementary material
Source: ML conference proceedings conference paper supplement (https://openreview.net/forum?id=ecqTSIMR2o)
Supplement: supplementary_material [file supp3.pdf › Supplementary/supp3.pdf]

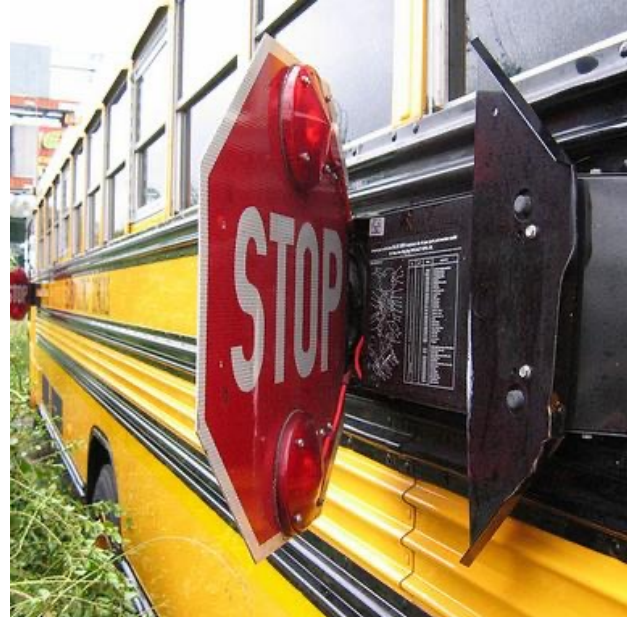

Raw Image

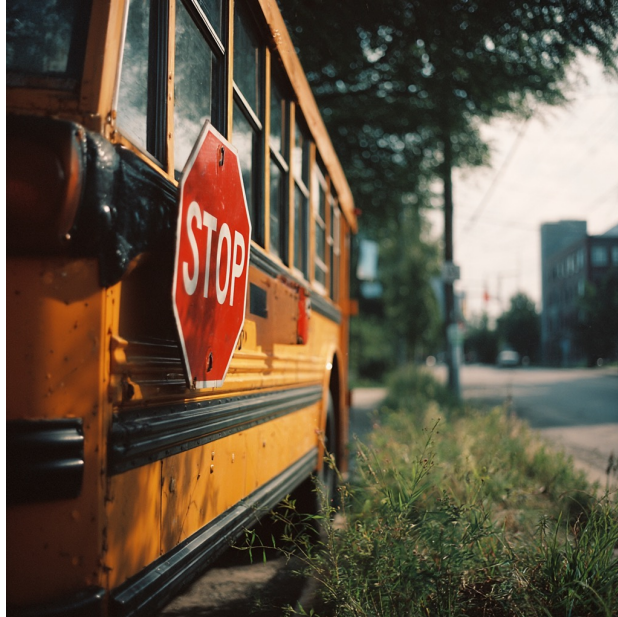

Midjourney

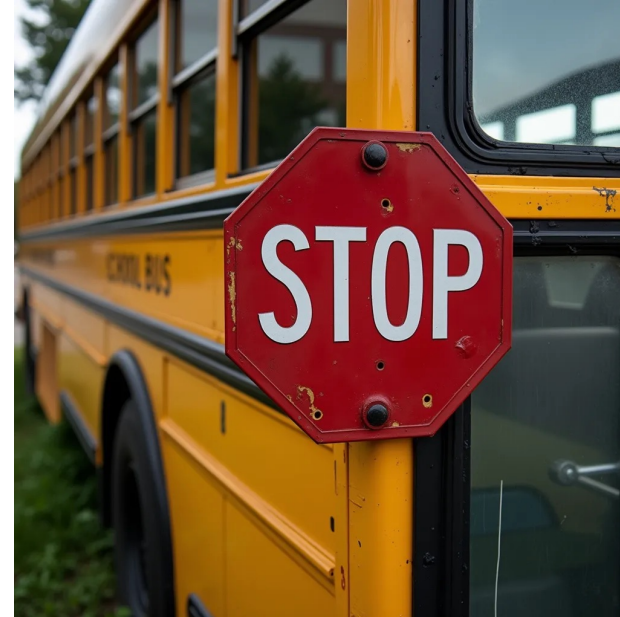

FLUX.1-dev

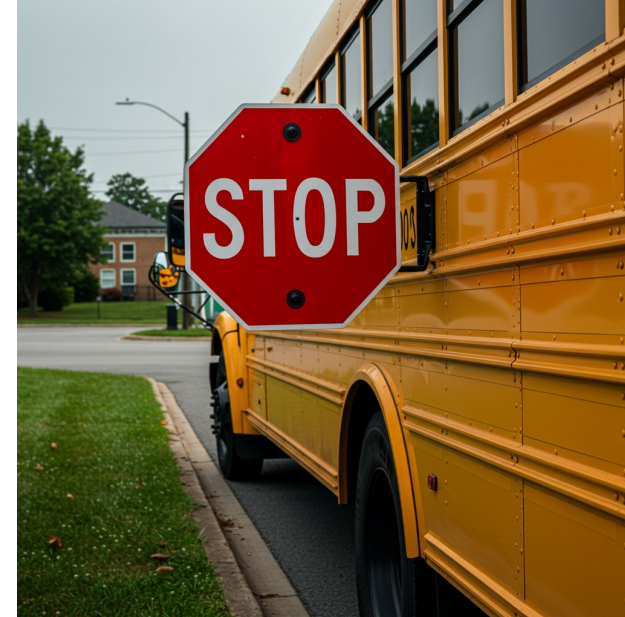

ImageFX

**Caption:** The image shows a close-up view of a yellow school bus with a red stop sign attached to its side. The stop sign is red with white lettering that reads \"STOP\" in large, bold letters. The stop sign is attached to the side of the bus with a black metal bracket. The bus is parked on the side of the road, and there is some green grass growing along the edge of the road. In the background, there are some buildings and trees. The lighting in the image is soft and diffused, and there are some shadows cast by the bus and the stop sign. The overall mood of the image is neutral and observational. The focus is on the details of the stop sign and its attachment to the bus. The image is taken from a low angle, looking up at the side of the bus. The texture of the bus is smooth and shiny, while the stop sign has a rougher texture. The image is well-composed and visually appealing. The colors are vibrant and saturated, and the image is well-lit. The overall impression is one of a mundane, everyday scene.
