# Supplementary material
Source: ML conference proceedings conference paper supplement (https://openreview.net/forum?id=ecqTSIMR2o)
Supplement: supplementary_material [file supp4.pdf › Supplementary/supp4.pdf]

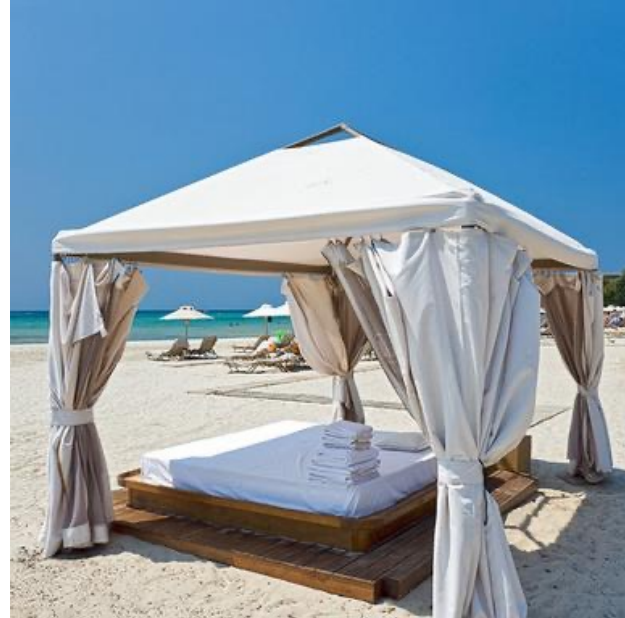

Raw Image

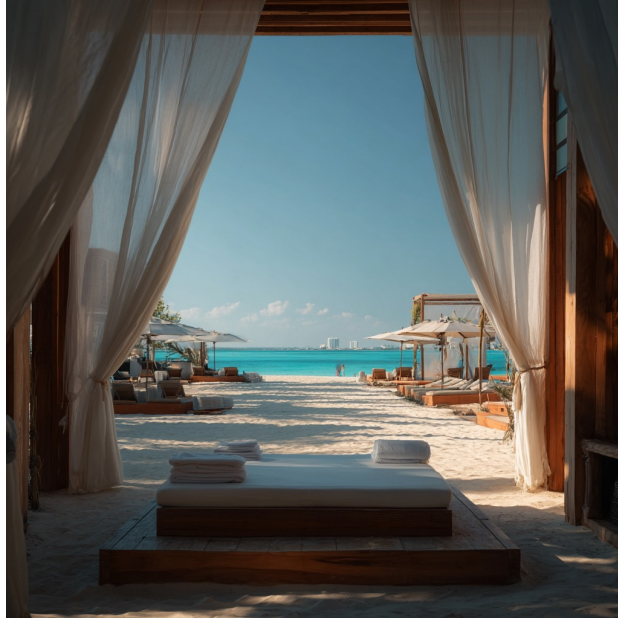

Midjourney

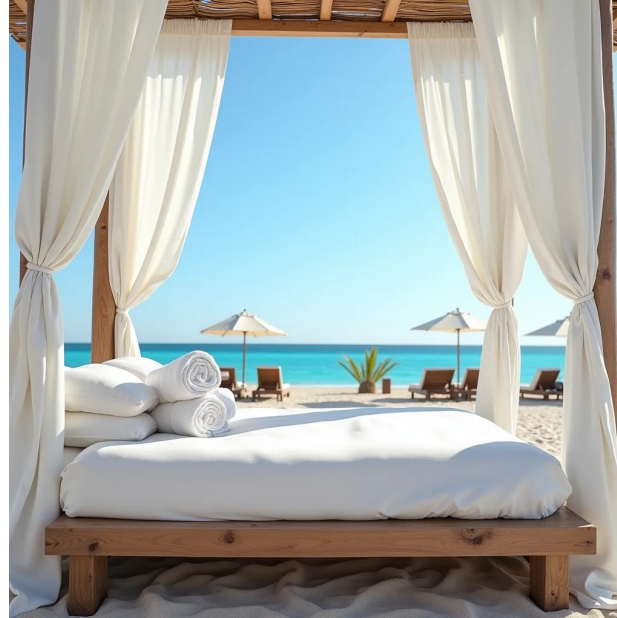

FLUX.1-dev

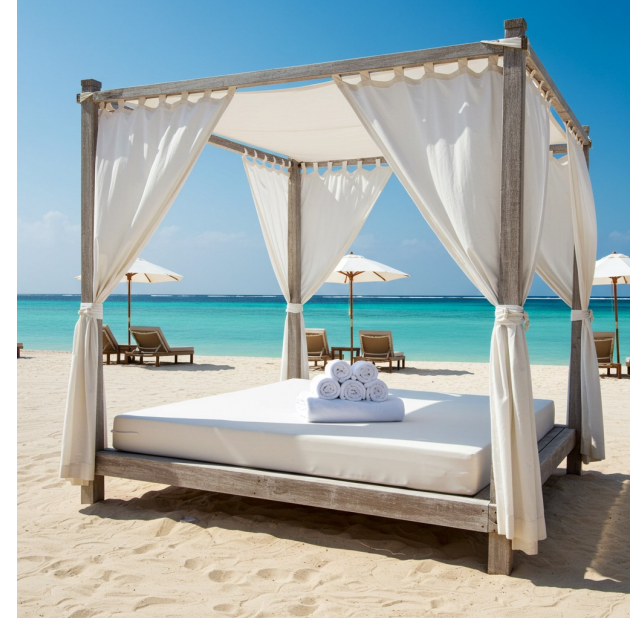

ImageFX

**Caption:** The image shows a luxurious outdoor bed setup on a sandy beach under a clear blue sky. The bed is elevated on a wooden platform and is covered with a white bedspread. A neatly folded stack of white towels sits on top of the bed. The bed is framed by white curtains that are tied back on either side, creating a sense of enclosure and privacy. The curtains are draped in a way that allows light to filter through, adding a soft glow to the scene. In the background, the turquoise ocean stretches out to the horizon, with several lounge chairs and beach umbrellas scattered along the shoreline. The sand is light-colored and appears to be well-maintained. The lighting is bright and sunny, casting soft shadows and highlighting the textures of the sand, wood, and fabric. The overall mood is serene and luxurious, evoking a sense of relaxation and vacation. The composition is well-balanced, with the bed as the focal point and the beach setting providing a natural and inviting backdrop. There are no people or animals visible in the image. The atmosphere is calm and peaceful, suggesting a perfect day at the beach. The colors are vibrant and natural, with the white of the bed and curtains contrasting against the blue of the sky and ocean. The textures are varied, from the smooth sand to the rough wood of the platform and the soft fabric of the curtains.
