# Supplementary material
Source: ML conference proceedings conference paper supplement (https://openreview.net/forum?id=ecqTSIMR2o)
Supplement: supplementary_material [file supp5.pdf › Supplementary/supp5.pdf]

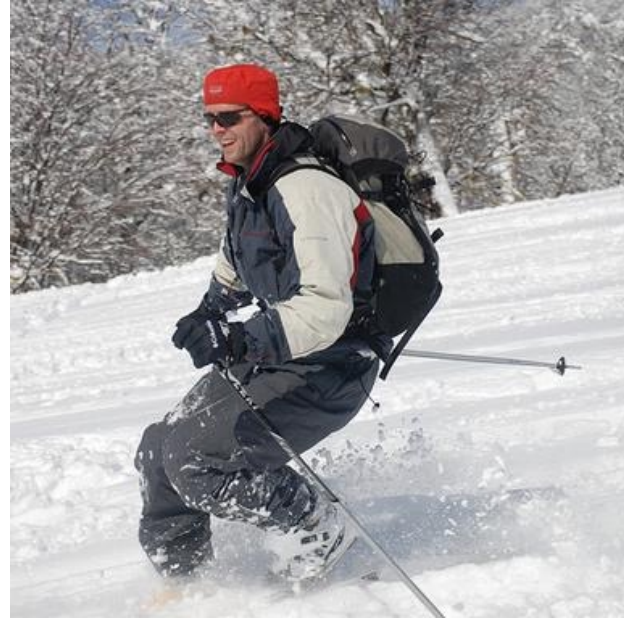

Raw Image

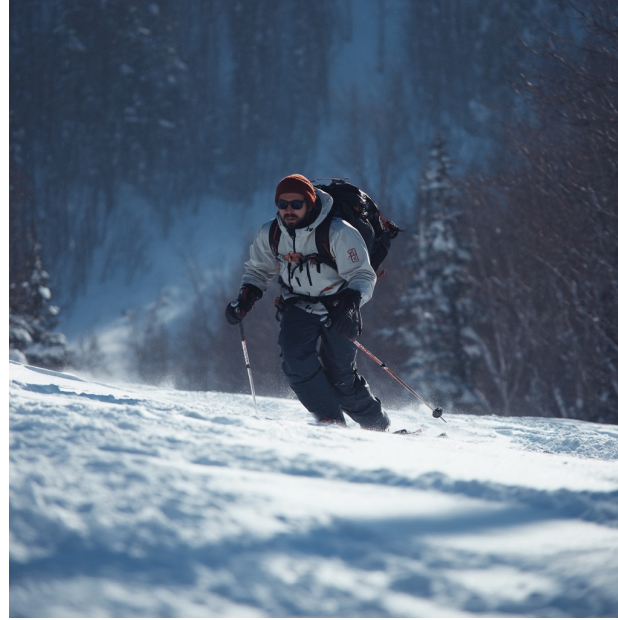

Midjourney

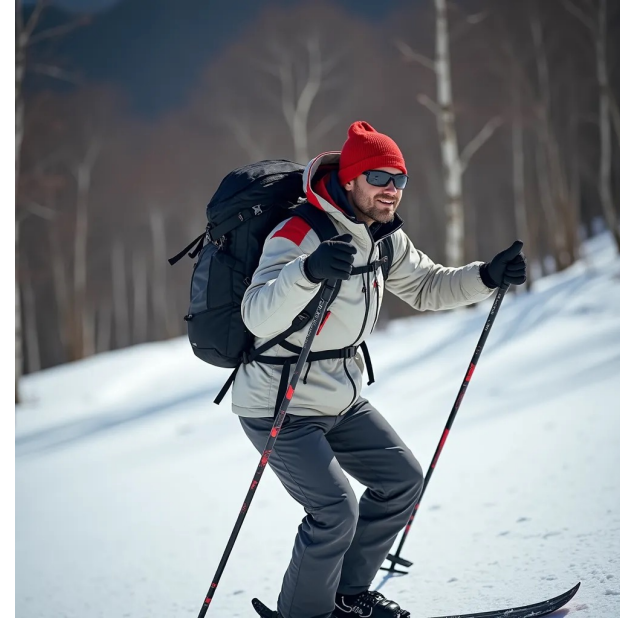

FLUX.1-dev

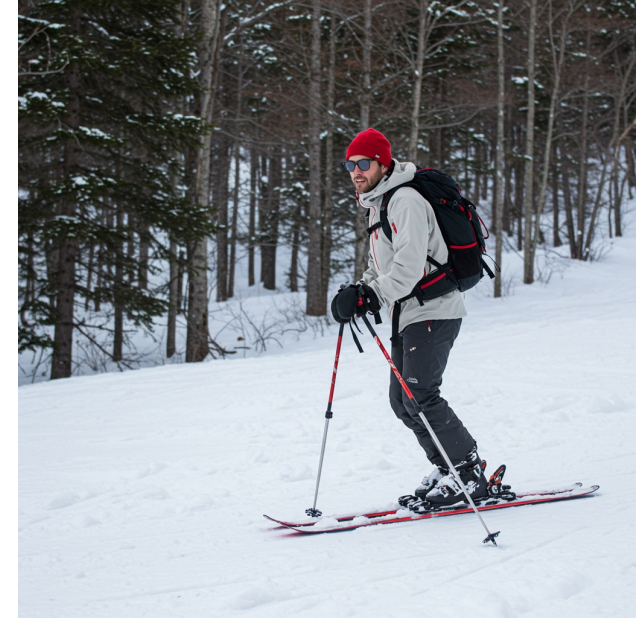

ImageFX

**Caption:** A medium shot captures a man skiing down a snow-covered slope. He is wearing a red beanie, dark sunglasses, and a light-colored ski jacket with black and red accents, paired with dark gray ski pants. A large black and gray backpack is slung over his shoulders. He is using ski poles to navigate the slope, and his expression is one of concentration and enjoyment. The background features a dense forest of bare trees, suggesting a winter setting. The ground is covered in snow, and the lighting is bright, casting shadows that add depth to the scene. The overall mood is one of outdoor adventure and winter sports. The texture of the snow is visible, adding to the realism of the image. The colors are muted, with the red of the beanie and jacket providing a pop of color against the predominantly white and gray tones of the scene. The man's ski tracks are visible in the snow, indicating his movement. The atmosphere is cold and crisp, typical of a winter day. The image is well-composed, with the man in the foreground and the forest in the background, creating a sense of depth. The lighting is bright and natural, enhancing the colors and textures of the scene. The overall impression is one of winter sports and outdoor adventure. The man's expression is one of enjoyment and concentration, adding to the overall mood of the image.
